# Supplementary material
Source: PubMed Central journal article supplement (PMC5386996)
Supplement: BPH-174-796-s001.pdf [file BPH-174-796-s001.pdf]

## Supplementary information

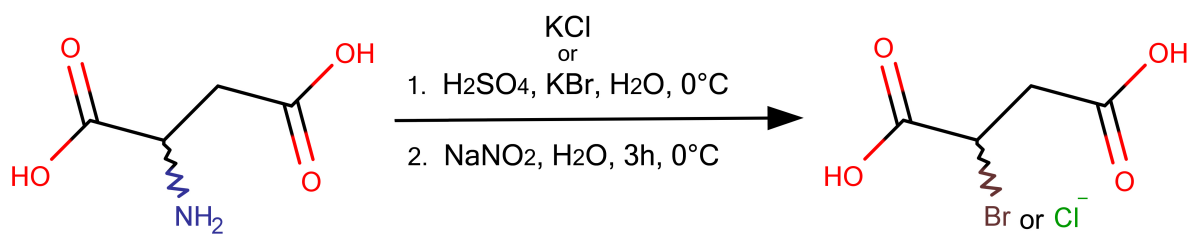

**Supplementary Fig. 1.** Synthesis of halogeno succinic acid.

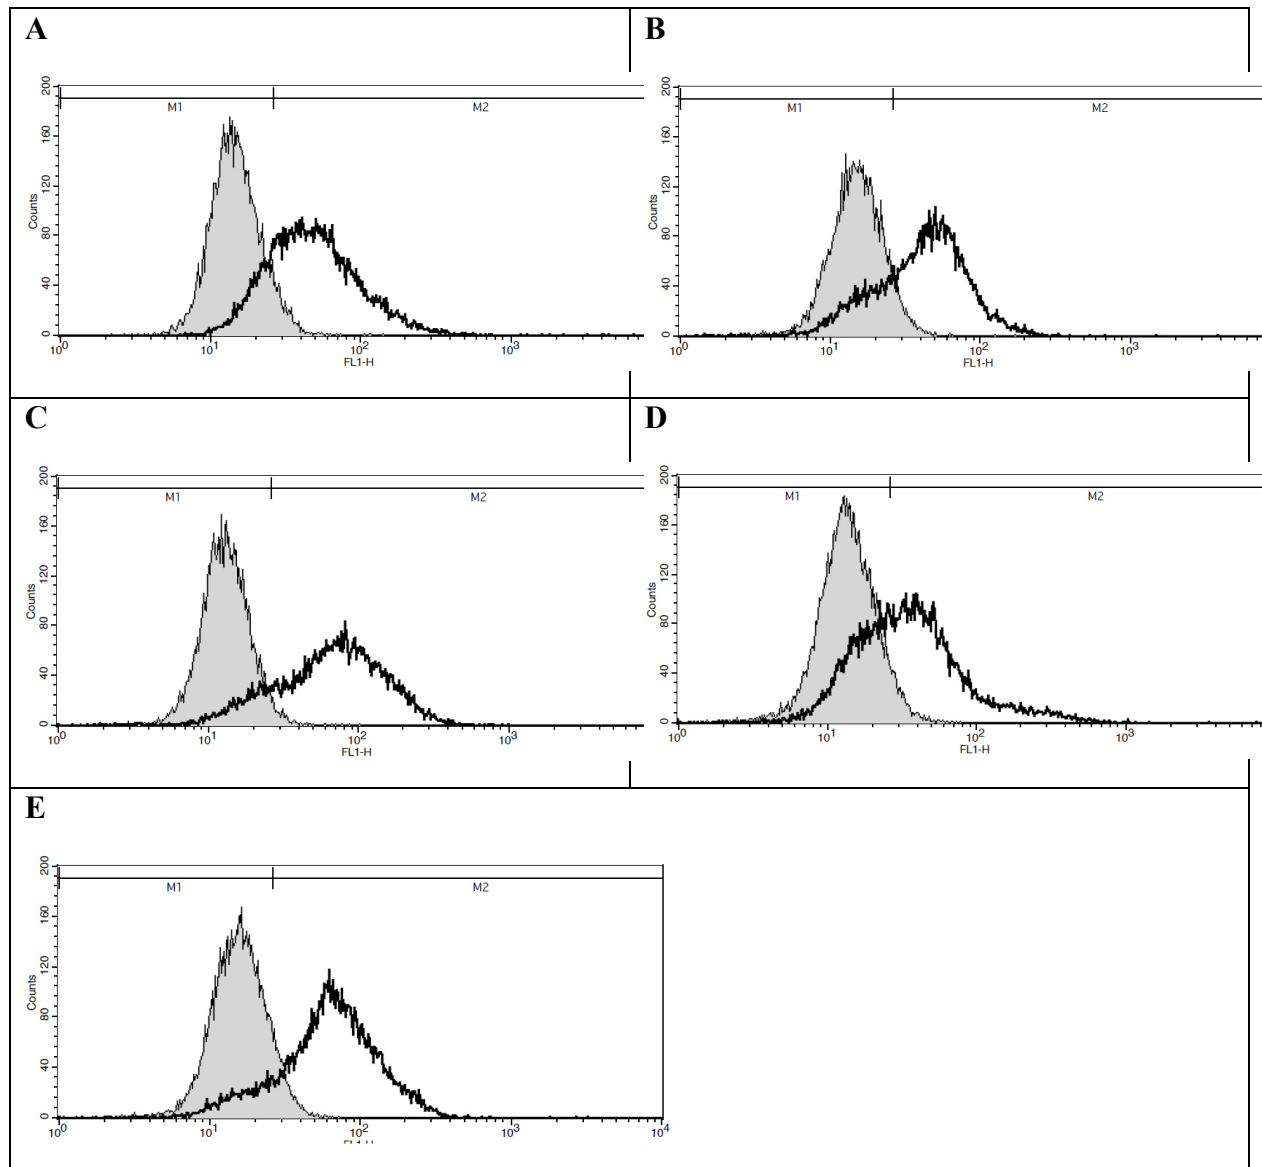

**Supplementary figure 2.** FACS Analysis of HEK293 stably transfected with several SUCNR1 mutants. A. WT; B. R252A; C. R281A; D. R99A; E. H103A

## Supplementary Methods

Elemental analyses (C, H, N, S) were determined on a Thermo Scientific Flash EA 1112 elemental analyzer (Thermo Fisher Scientific, Waltham, Massachusetts, USA) and were within  $\pm 0.4\%$  of the theoretical values. The  $^1\text{H}$  and  $^{13}\text{C}$  NMR spectra were recorded on a Bruker Avance 500 MHz instrument (Bruker, Billerica, Massachusetts, USA) using deuterated dimethyl sulfoxide ( $d_6$ -DMSO) as the solvent and tetramethylsilane (TMS) as an internal standard; chemical shifts are reported in  $\delta$  values (ppm) relative to that of internal TMS. The abbreviations s = singlet, d = doublet, t = triplet, q = quadruplet, m = multiplet, and br = broad are used throughout.

## Synthesis

The synthesis of halogeno derivatives is slightly modified from Zurwerra *et al* (Zurwerra *et al.*, 2012). To a solution of R or S-Aspartic (1.00 g, 1 equiv) in 20 mL of  $\text{H}_2\text{SO}_4$  2M (6.60 equiv) at  $0^\circ\text{C}$  (NaCl/ice) was added KBr (4.00 g, 4.5 equiv) or KCl (2.52 g, 4.5 equiv) followed by a drop addition of a  $\text{NaNO}_2$  solution (0.92 g, 1.80 equiv) in  $\text{H}_2\text{O}$  (2 mL). After 3h at  $0^\circ\text{C}$ , the halogenosuccinate was extracted with EtOAc (15mL x 3) and dried over  $\text{MgSO}_4$ . The final compound was concentrated under reduced pressure as a white to yellowish compound.

### *R*-Bromosuccinic acid

(2R)-2-Bromosuccinic acid:  $^1\text{H}$  NMR (500 MHz,  $\text{DMSO-}d_6$ )  $\delta$  12.98 (br. s, 2H), 4.52 (dd,  $J = 8.5, 6.3$  Hz, 1H), 3.08 (dd,  $J = 17.1, 8.6$  Hz, 1H), 2.89 (dd,  $J = 17.1, 6.3$  Hz, 1H).  $^{13}\text{C}$  NMR (126 MHz,  $\text{DMSO-}d_6$ )  $\delta$  170.99, 170.11, 40.51, 39.49. Anal. ( $\text{C}_4\text{H}_5\text{O}_4\text{Br}$ ) theoretical: C 24.39; H 2.56. Found: C 24.99; H 2.61

### *R*-Chlorosuccinic acid

(2R)-2-Chlorosuccinic acid:  $^1\text{H}$  NMR (500 MHz,  $\text{DMSO-}d_6$ )  $\delta$  12.91 (br s, 2H), 4.63 (t,  $J = 7.0$  Hz, 1H), 2.99 (dd,  $J = 17.0, 7.2$  Hz, 1H), 2.84 (dd,  $J = 16.9, 6.7$  Hz, 1H).  $^{13}\text{C}$  NMR (126 MHz,  $\text{DMSO-}d_6$ )  $\delta$  170.60, 169.61, 52.61, 39.26. Anal. ( $\text{C}_4\text{H}_5\text{O}_4\text{Cl}$ ) theoretical: C 31.50; H 3.30. Found: C 31.51; H 3.37

### *S*-Chlorosuccinic acid

(2S)-2-Chlorosuccinic acid:  $^1\text{H}$  NMR (500 MHz,  $\text{DMSO-}d_6$ )  $\delta$  12.91 (br s, 2H), 4.63 (t,  $J = 7.0$  Hz, 1H), 2.99 (dd,  $J = 17.0, 7.2$  Hz, 1H), 2.84 (dd,  $J = 16.9, 6.7$  Hz, 1H).  $^{13}\text{C}$  NMR (126 MHz,  $\text{DMSO-}d_6$ )  $\delta$  170.60, 169.61, 52.61, 39.26. Anal. ( $\text{C}_4\text{H}_5\text{O}_4\text{Cl}$ ) theoretical: C 31.50; H 3.30. Found: C 31.42; H 3.37

## Flow cytometry analysis

The following commercially available antibodies was used for FACS analysis: monoclonal anti-FLAG clone M2 (F3165) from Sigma-Aldrich (St Louis, Missouri, USA), anti-Mouse (Alexa Fluor<sup>®</sup> 488 Conjugate, 4408) from Cell Signaling Technology (Danvers, Massachusetts, USA). Cells ( $2 \cdot 10^5$  cells per tube) were incubated with monoclonal ANTI-FLAG M2 for 45 min at  $4^\circ\text{C}$ . After wash, cells were incubated with anti-Mouse IgG (H+L), F(ab')<sub>2</sub> Fragment (1:1000, Alexa Fluor<sup>®</sup> 488 Conjugate) for 45 min at  $4^\circ\text{C}$  in the dark. Data were acquired on BD FACSCalibur 2 lasers (Becton Dickinson) and analysed with Cellquest pro. The gate on living cells was made using the SSC/FSC dot plot.
